# Supplementary material
Source: PubMed Central journal article supplement (PMC5819601)
Supplement: NIHMS941383-supplement-Appendix.pdf [file NIHMS941383-supplement-Appendix.pdf]

## Supplementary Appendix

This appendix has been provided by the authors to give readers additional information about their work.

Supplement to: Connors JM, Jurczak W, Straus DJ, et al. Brentuximab vedotin with chemotherapy for stage III or IV Hodgkin's lymphoma. *N Engl J Med* 2018;378:331-44. DOI: 10.1056/NEJMoa1708984

(PDF updated January 26, 2018)

## **Supplementary Appendix**

Supplement to: Connors JM, Jurczak W, Straus DJ, et al. Brentuximab Vedotin with Chemotherapy for Stage III or IV Hodgkin's Lymphoma

### **Contents**

|                                         |         |
|-----------------------------------------|---------|
| ECHELON-1 Investigators                 | page 2  |
| Methods Text Not Included in Main Paper | page 5  |
| Supplementary Figures S1 and S2         | page 7  |
| Supplementary Tables S1–S8              | page 9  |
| References                              | page 18 |

## **ECHELON-1 Investigators**

In addition to the authors, the following investigators (listed by country) participated in the ECHELON-1 study:

**Australia:** Ashish Bajel; Philip Campbell; Paul Cannell; Douglas Coghlan; Matthew Greenwood; Andrew Grigg; Mark Stephen Hertzberg; Anna Johnston; John Kwan; Ray Lowenthal; David Ritchie; John Taper; Kerry Taylor; **Belgium:** Fritz Offner; Achiel van Hoof; ka Lung Wu; **Brazil:** Valeria Buccheri; Marcelo Capra; Carlos Chiattonne; Johnny Cordeiro Camargo; Felipe Silva Melo Cruz; Marco Aurelio Salvino Araujo; Adriana Scheliga; **Canada:** Neil Berinstein; Mark Bosch; Neil Chua; Mary Margaret Keating; John Kuruvilla; David Macdonald; Pamela Skrabek; John Storrington; **Czech Republic:** Jan Koren; Jana Markova; Heidi Mocikova; Pavla Stepankova; Alice Sykorova; **Denmark:** Ilse Christiansen; Francesco D'Amore; Lisbeth Enggaard; Jacob Haaber; Bodil Himmelstrup; Bo Amdi Jensen; Michael Pedersen; Lena Specht; **France:** Pauline Brice; Driss Chaoui; Lysiane Molina; Laurent Sutton; Mohamed Touati; **Hong Kong:** Yok-Lam Kwong; Harold Kwok Kuen Lee; Ting Ying Ng; **Hungary:** Zita Borebenyi; Judit Demeter; Zoltan Gastony; Tamas Masszi; Gabor Mikala; Agnes Nagy; **Italy:** Emanuele Angelucci; Angelo Michele Carella; Angela Giovanna Congiu; Massimo Federico; Alessandro Gianni; Stefan Hohaus; Giuseppe Leone; Pietro Leoni; Stefano Luminari; Stefania Massidda; Andrea Mengarelli; Pellegrino Musto; Fabrizio Pane; Samantha Pozzi; Davide Rapezzi; Armando Santoro; Simonetta Viviani; Francesco Zallio; **Japan:** Yasunobu Abe; Kiyoshi Ando; Ilseung Choi; Noriko Fukuhara; Kiyohiko Hatake; Tatsuo Ichinohe; Kenichi Ishizawa; Koji Kato; Tomohiro Kinoshita; Dai Maruyama; Hirohiko Shibayama; Kensei Tobinai; Norifumi Tsukamoto; Naukuni Uike; Kazuhito Yamamoto; **Norway:** Anne Turid Bjernevik; Alexander Fossaa; **Poland:** Andrzej Hellmann; Wanda Knopinska-Postuszny; Kazimierz Kuliczkowski; Slawomira Kyrz-Krzemien; Tadeusz Robak; Krzysztof Warzocha; **Republic of Korea:** June Won Cheong; Young Rok Do; HyeonSeok Eom; Ki-Seong Eom; Dae Seog Heo; Jae-Young Kwak; Jae Hoon Lee; Jung Hee Lee;

Yeung-Chul Mun; Sung-Yong Oh; Deok-Hawn Yang; Dok-Hyun Yoon; **Russia:** Boris Afanasyev; Alexey Kuzmin; Oleg Lipatov; Tatiana Moiseeva; Dzhelil Osmanov; Evgen Osmanov; Irina Poddubnaya; Daniil Stroyakovskii; Gayane Tumyan; **South Africa:** Fatima Bassa; Graham Cohen; Jeremia Cronje; Lydia Dreosti; Andrew McDonald; Moosa Patel; Anca Pirjol; Bernardo Rapoport; Paul Ruff; Neonyana Tabane; **Spain:** Javier Briones; Ramon Garcia Sanz; Maria Jose Terol; Carmen Martinez; Miriam Moreno; Manuel Perez Encinas; Mercedes Rodriguez; Antonio Rueda; Blanca Sánchez González; Anna Sureda; **Taiwan:** Cheng-Shyong Chang; Chih-Cheng Chen; Tsai-Yun Chen; Tzeon-Jye Chiou; Po-Nan Wang; **Turkey:** Ibrahim Barista; Guven Cetin; Mahmut Gumus; Harika Okutan; Evren Ozdemir; Bryson Pottinger; Mehmet Turgut; **United Kingdom:** Graham Collins; Dominic Culligan; Paul Fields; Peter Forsyth; Paul Greaves; John Gribben; Claire Hemmaway; Peter Johnson; Nagesh Kalakonda; Paul Kerr; Biju Krishnan; Anton Kruger; Jonathan Lambert; Ram Malladi; Pam McKay; Andrew McMillan; Fiona Miall; Ruth Pettengell; Christopher Pocock; Bryson Pottinger; Claire Rowntree; Claudius Rudin; Shalal Sadullah; Gamal Sidra; Lynny Yung; **United States of America:** Haifaa Abdulhaq; David Aboulafia; Jeremy Abramson; Ranjana Advani; Ivan Aksentijevich; Jennifer Amengual; Bertrand Anz; Jose Azar; Veronika Bachanova; Stefan Barta; Naresh Bellam; Maurice Berkowitz; J Kristie Blum; Ralph Boccia; Robert Gregory Bociek; Thomas Boyd; Micah Burch; Bruce Cheson; Saurabh Chhabra; Rangaswamy Chintapatla; Howland Crosswell; Andrea Dean; Sven deVos; Brian DiCarlo; Christopher DiSimone; Tracy Dobbs; William Ehmann; Thomas Jeffry Ervin; James Essell; Charles Farber; Justin Favaro; Timothy Fenske; Matthew Fero; Ian Flinn; Andres Forero-Torres; Jonathan Friedberg; Lawrence Garbo; Nilanjan Ghosh; Thomas Giever; Aileen Go; Ajay Gopal; Andre Goy; Daniel Greenwald; Michael Grossbard; Julio Hajdenberg; Ahmad Halwani; Mehdi Hamadani; James Hampton; Brian Hess; Roger Holden; Beata Holkova; Mark Hutchins; Murali Janakiram; Mark Kaminski; Abraham Sebastian Kanate; Yvette Kasamon; Stephen Kendall; Nadia Khan; Amy Kimball; Edwin Kingsley; Ebenezer Kio; Andreas Klein; Leonard Klein; Mark Knapp; Kathryn Kolibaba; Scott Kono; Ann Steward LaCasce; William Lawler; Lorie Leslie; Kiem Dian Liem; Brian Link; Scott Lunin; Roger

Lyons; Peter Martin; Elizabeth McGuire; Jason M. Melear; Mehdi Moezi; Aldemar Montero;  
Javier Munoz; Rajesh Nair; Sunita Nasta; Sreenivasa Nattam; Lola Olajide; Gregg Arden  
Olsen; Gladys Onojobi; Adam Matthew Petrich; Barbara Pro; Thomas Rado; Vijay Rao;  
Istvan Redei; Erin Reid; Ruben Reyes; Peter Rosen; Joseph Rosenblatt; Amir  
Schierberg; Valeriy Sedov; Danielle Shafer; Jeff Porter Sharman; Gary Spitzer; Alexander  
Starodub; Amir Steinberg; Keren Sturtz; Michaela Tsai; Anil Tulpule; Joseph Tuscano;  
Abdulraheem Yacoub; Christopher Yasenchak; Habte Yimer.

## Methods Text Not Included in Main Paper

### Text S1. Modified Progression-free Survival.

Clinical trials evaluating the effectiveness of potentially curative systemic chemotherapy require definition of events considered to reveal failure of the regimens used to accomplish that goal. In advanced Hodgkin's lymphoma, two outcomes exposing failure of the primary treatment are straightforward to define: progression of the disease or death from any cause. However, a third possible outcome representing failure of the primary intervention has been variably identified in clinical trials: persistence of the disease despite completion of the planned primary treatment, a situation which then prompts additional rapid intervention. This latter situation clearly represents failure of the primary treatment even though neither progression nor death has occurred. Moreover, because delivery of subsequent treatment, which often includes salvage chemotherapy and an autologous hematopoietic stem cell transplant, is effective at preventing future progression the failure of frontline therapy in this scenario is not reflected by standard progression-free survival. To capture all events that reflect a failure of frontline chemotherapy in advanced Hodgkin's lymphoma the ECHELON-1 study primary end point of modified progression-free survival also included modified progression events, defined as a response that was less than complete at the end of primary chemotherapy (an end-of-treatment positron-emission tomography [PET] scan score Deauville 3, 4, or 5) **AND** the delivery of subsequent treatment. Both conditions had to be present to consider the patient to have experienced a modified progression event. Neither one in isolation was sufficient so that patients with false positive end-of-treatment PET scans that did not progress without additional therapy or those who received subsequent therapy in the absence of evidence of residual disease were not considered to have had a modified progression event. Furthermore, potential investigator bias for the modified end point was minimized in the ECHELON-1 study by the use of a blinded independent review committee

to read the end-of-treatment PET scans; results from the independent review committee read were not available to investigators.

## Supplementary Figures S1 and S2

**Figure S1. CONSORT Diagram.**

A+AVD, brentuximab vedotin plus doxorubicin, vinblastine, dacarbazine; ABVD, doxorubicin, bleomycin, vinblastine, dacarbazine; AE, adverse event; PET2, end-of-cycle-2 positron-emission tomography.

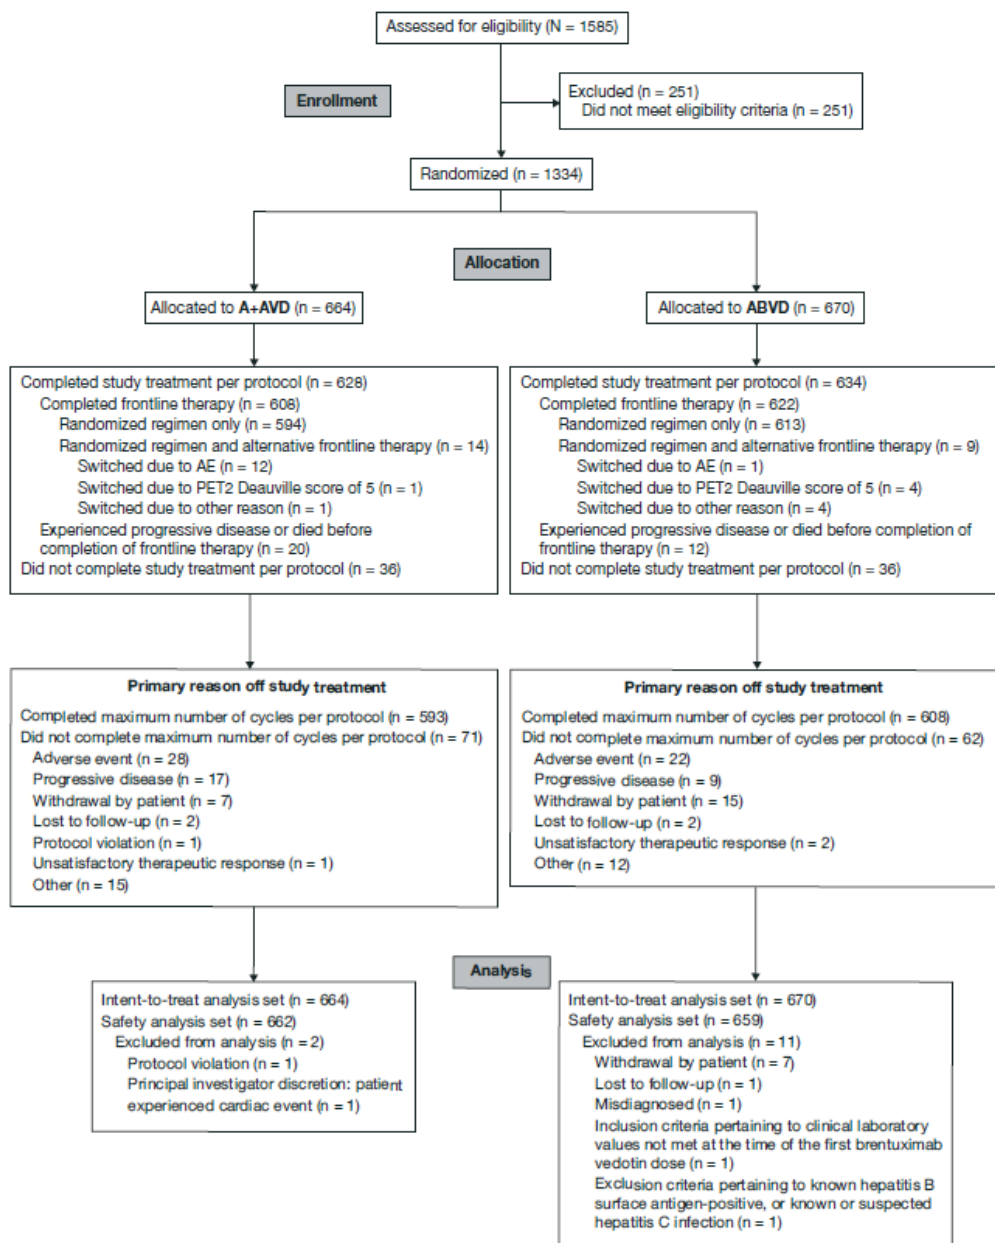



**Figure S2. Kaplan–Meier Analysis of Overall Survival in the Intention-to-treat Population.**

A+AVD, brentuximab vedotin plus doxorubicin, vinblastine, dacarbazine; ABVD, doxorubicin, bleomycin, vinblastine, dacarbazine; CI, confidence interval.

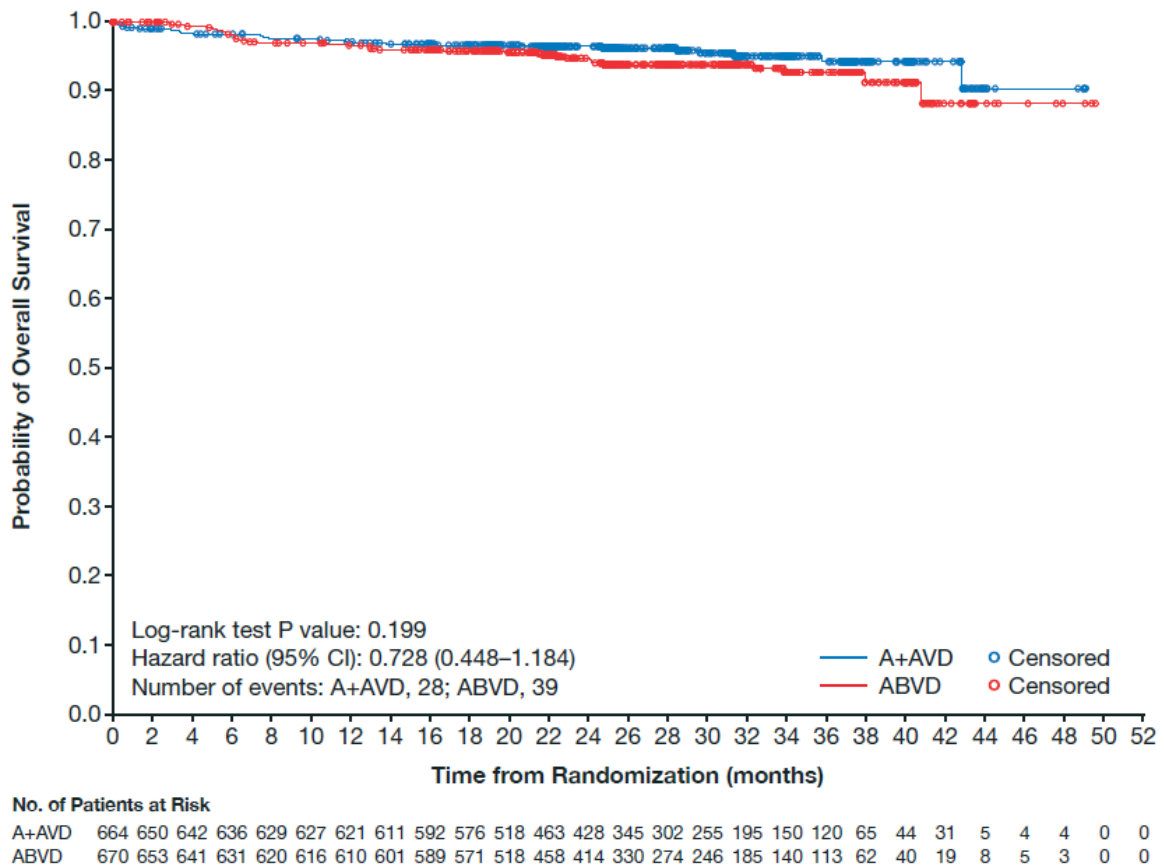

## Supplementary Tables S1–S8

**Table S1. Details of Brentuximab Vedotin Dose Modifications.**

| <b>Toxicity</b>                        | <b>≤Grade 2</b>                               | <b>≥Grade 3</b>                                                                                                                                                                                                                                       |                                                                                                                                                                                                                                                    |                                                   |
|----------------------------------------|-----------------------------------------------|-------------------------------------------------------------------------------------------------------------------------------------------------------------------------------------------------------------------------------------------------------|----------------------------------------------------------------------------------------------------------------------------------------------------------------------------------------------------------------------------------------------------|---------------------------------------------------|
| Non-hematologic (excluding neuropathy) | Continue at same dose level                   | Hold A+AVD dosing until toxicity has resolved to ≤Grade 2 or has returned to baseline*                                                                                                                                                                |                                                                                                                                                                                                                                                    |                                                   |
| Hematologic                            | Continue at same dose level                   | For neutropenia, manage with growth factors (G-CSF or GM-CSF) per institutional guidelines. For thrombocytopenia, consider platelet transfusion and/or proceed according to institutional guidelines. For anemia, manage per institutional guidelines |                                                                                                                                                                                                                                                    |                                                   |
| Peripheral neuropathy                  | <b>Grade 1</b><br>Continue at same dose level | <b>Grade 2</b><br>Reduce dose to 0.9 mg/kg and resume treatment; if already at 0.9 mg/kg, continue dosing at that level                                                                                                                               | <b>Grade 3</b><br>Withhold brentuximab vedotin until toxicity is ≤Grade 2, then reduce dose to 0.9 mg/kg and resume treatment. If already at 0.9 mg/kg, consult with sponsor (AVD may be continued or held concurrently at physician's discretion) | <b>Grade 4</b><br>Discontinue brentuximab vedotin |

\*Patients who develop clinically insignificant Grade 3 or 4 electrolyte laboratory abnormalities may continue study treatment without interruption.

A+AVD, brentuximab vedotin plus doxorubicin, vinblastine, dacarbazine; G-CSF, granulocyte colony-stimulating factor; GM-CSF, granulocyte-macrophage colony-stimulating factor.

**Table S2. International Prognostic Score for Hodgkin's Lymphoma.**

| <b>Risk factor</b>                                                      |
|-------------------------------------------------------------------------|
| Male sex                                                                |
| Age $\geq$ 45 yr                                                        |
| Stage IV disease                                                        |
| Hemoglobin $<$ 10.5 g/dL                                                |
| White-cell count $\geq$ 15 $\times 10^9$ /L                             |
| Lymphocyte count $<$ 0.6 $\times 10^9$ /L or $<$ 8% of white-cell count |
| Serum albumin $<$ 4 g/dL                                                |

The International Prognostic Score<sup>1</sup> ranges from 0 to 7, with higher scores indicating increased risk of treatment failure. Patients score one point for each factor present. Scores of 0 to 1 denote low risk, scores of 2 to 3 intermediate risk, and scores of 4 to 7 high risk.

**Table S3. Patient Demographics and Clinical Characteristics at Baseline (Intention-to-treat Population).**

| Characteristic                                                | A+AVD<br>N = 664 | ABVD<br>N = 670 | Total<br>N = 1334 |
|---------------------------------------------------------------|------------------|-----------------|-------------------|
| Sex — no. (%)                                                 |                  |                 |                   |
| Male                                                          | 378 (57)         | 398 (59)        | 776 (58)          |
| Female                                                        | 286 (43)         | 272 (41)        | 558 (42)          |
| Median age (range) — yr                                       | 35.0 (18–82)     | 37.0 (18–83)    | 36.0 (18–83)      |
| Age categories (yr) — no. (%)                                 |                  |                 |                   |
| <45                                                           | 451 (68)         | 423 (63)        | 874 (66)          |
| 45–59                                                         | 129 (19)         | 145 (22)        | 274 (21)          |
| 60–64                                                         | 24 (4)           | 40 (6)          | 64 (5)            |
| ≥65                                                           | 60 (9)           | 62 (9)          | 122 (9)           |
| Race — no. (%)                                                |                  |                 |                   |
| White                                                         | 560 (84)         | 554 (83)        | 1114 (84)         |
| Asian                                                         | 56 (8)           | 57 (9)          | 113 (8)           |
| Black or African American                                     | 20 (3)           | 25 (4)          | 45 (3)            |
| Other                                                         | 18 (3)           | 17 (3)          | 35 (3)            |
| Not reported                                                  | 10 (2)           | 17 (3)          | 27 (2)            |
| Regions — no. (%)                                             |                  |                 |                   |
| Americas                                                      | 261 (39)         | 262 (39)        | 523 (39)          |
| Europe                                                        | 333 (50)         | 336 (50)        | 669 (50)          |
| Asia                                                          | 70 (11)          | 72 (11)         | 142 (11)          |
| Ann Arbor stage at initial diagnosis — no. (%) <sup>*</sup>   |                  |                 |                   |
| Stage I                                                       | 0                | 0               | 0                 |
| Stage II <sup>†</sup>                                         | 1 (<1)           | 0               | 1 (<1)            |
| Stage III                                                     | 237 (36)         | 246 (37)        | 483 (36)          |
| Stage IV                                                      | 425 (64)         | 421 (63)        | 846 (64)          |
| Not applicable, unknown, or missing                           | 1 (<1)           | 3 (<1)          | 4 (<1)            |
| IPS — no. (%) <sup>‡</sup>                                    |                  |                 |                   |
| 0 or 1                                                        | 141 (21)         | 141 (21)        | 282 (21)          |
| 2 or 3                                                        | 354 (53)         | 351 (52)        | 705 (53)          |
| 4 to 7                                                        | 169 (25)         | 178 (27)        | 347 (26)          |
| ECOG performance status — no. (%) <sup>§</sup>                |                  |                 |                   |
| 0                                                             | 376 (57)         | 378 (57)        | 754 (57)          |
| 1                                                             | 260 (39)         | 263 (39)        | 523 (39)          |
| 2                                                             | 28 (4)           | 27 (4)          | 55 (4)            |
| 3 or 4                                                        | 0                | 0               | 0                 |
| Not obtained or missing                                       | 0                | 2 (<1)          | 2 (<1)            |
| Bone marrow involvement at diagnosis or study entry — no. (%) |                  |                 |                   |
| Yes                                                           | 147 (22)         | 151 (23)        | 298 (22)          |
| No                                                            | 502 (76)         | 509 (76)        | 1011 (76)         |
| Unknown or missing                                            | 15 (2)           | 10 (1)          | 25 (2)            |
| Extranodal involvement at diagnosis — no. (%)                 |                  |                 |                   |
| Yes                                                           | 411 (62)         | 416 (62)        | 827 (62)          |
| 1 extranodal site                                             | 217 (33)         | 223 (33)        | 440 (33)          |
| >1 extranodal sites                                           | 194 (29)         | 193 (29)        | 387 (29)          |
| No                                                            | 217 (33)         | 228 (34)        | 445 (33)          |
| Unknown or missing                                            | 36 (5)           | 26 (4)          | 62 (5)            |
| Patients with any B symptom — no. (%) <sup>¶</sup>            | 400 (60)         | 381 (57)        | 781 (59)          |

Percentages may not total 100 because of rounding.

<sup>\*</sup>The Ann Arbor staging system<sup>2</sup> ranges from I to IV, with higher stages indicating more widespread disease.

<sup>†</sup>Patients in this category have major protocol violation.

<sup>‡</sup>The IPS<sup>1</sup> ranges from 0 to 7, with higher scores indicating increased risk of treatment failure. Scores of 0 to 1 denote low risk, scores of 2 to 3 intermediate risk, and scores of 4 to 7 high risk.

<sup>§</sup>Values for ECOG performance status<sup>3</sup> range from 0 to 5, with higher scores indicating greater disability.

<sup>¶</sup>B symptoms consist of night sweats, unexplained fever (temperature >38°C), or loss of more than 10% of body weight.

A+AVD, brentuximab vedotin plus doxorubicin, vinblastine, dacarbazine; ABVD, doxorubicin, bleomycin, vinblastine, dacarbazine; ECOG, Eastern Cooperative Oncology Group; IPS, International Prognostic Score.

**Table S4. Summary of First Subsequent Chemotherapy as Part of Salvage Treatment for Patients Failing to Achieve a Complete Response at the Completion of Frontline Therapy.**

| <b>First subsequent chemotherapy — no. (%)</b>          | <b>A+AVD<br/>N = 9</b> | <b>ABVD<br/>N = 22</b> | <b>Total<br/>N = 31</b> |
|---------------------------------------------------------|------------------------|------------------------|-------------------------|
| Overall                                                 | 7 (78)                 | 15 (68)                | 22 (71)                 |
| Cisplatin + cytarabine + dexamethasone                  | 3 (33)                 | 3 (14)                 | 6 (19)                  |
| Carboplatin + etoposide + ifosfamide                    | 2 (22)                 | 2 (9)                  | 4 (13)                  |
| Cisplatin + cytarabine + etoposide + methylprednisolone | 1 (11)                 | 3 (14)                 | 4 (13)                  |
| Brentuximab vedotin                                     | 0                      | 1 (5)                  | 1 (3)                   |
| Brentuximab vedotin + bendamustine + ASCT               | 0                      | 1 (5)                  | 1 (3)                   |
| Carboplatin + etoposide + ifosfamide + ASCT             | 1 (11)                 | 0                      | 1 (3)                   |
| Carboplatin + etoposide + ifosfamide + rituximab + ASCT | 0                      | 1 (5)                  | 1 (3)                   |
| Carboplatin + etoposide + ifosfamide + SCT              | 0                      | 1 (5)                  | 1 (3)                   |
| Dexamethasone + cisplatin + gemcitabine                 | 0                      | 1 (5)                  | 1 (3)                   |
| Dexamethasone + cytarabine + procarbazine               | 0                      | 1 (5)                  | 1 (3)                   |
| Rituximab + bendamustine                                | 0                      | 1 (5)                  | 1 (3)                   |

A+AVD, brentuximab vedotin plus doxorubicin, vinblastine, dacarbazine; ABVD, doxorubicin, bleomycin, vinblastine, dacarbazine; ASCT, autologous stem cell transplant; SCT, stem cell transplant.

**Table S5. Summary of Reasons for Switching to Alternative Chemotherapy during Frontline Therapy (Safety Population).**

| <b>Reason for switching to alternative chemotherapy — no. (%)</b> | <b>A+AVD<br/>N = 15</b> | <b>ABVD<br/>N = 9</b> | <b>Total<br/>N = 24</b> |
|-------------------------------------------------------------------|-------------------------|-----------------------|-------------------------|
| Adverse event                                                     | 12 (80)                 | 1 (11)                | 13 (54)                 |
| Deauville score assessment of 5*                                  | 1 (7)                   | 4 (44)                | 5 (21)                  |
| Other                                                             | 2 (13) <sup>†</sup>     | 4 (44) <sup>‡</sup>   | 6 (25)                  |

These changes to alternative frontline therapy prior to completion of treatment with the randomized regimen were not considered events as they occurred in the absence of disease progression.

\*The Deauville score<sup>4</sup> is a 5-point scale on which higher scores indicate greater uptake of <sup>18</sup>F-fluorodeoxyglucose at involved sites on PET. A score of 1 indicates no uptake, a score of 2 uptake at an initial site that is less than or equal to the uptake at the mediastinum, a score of 3 uptake at an initial site that is greater than uptake at the mediastinum but less than or equal to uptake at the liver, a score of 4 uptake at an initial site that is moderately increased as compared with uptake at the liver, and a score of 5 markedly increased uptake at any site or uptake at a new site of disease. The absence of complete response at the end of primary chemotherapy was defined as a Deauville score of 3, 4, or 5.

<sup>†</sup>Reason was unspecified for both patients.

<sup>‡</sup>Reasons included toxicity (n = 1), unsatisfactory response (n = 3).

A+AVD, brentuximab vedotin plus doxorubicin, vinblastine, dacarbazine; ABVD, doxorubicin, bleomycin, vinblastine, dacarbazine; PET, positron-emission tomography.

**Table S6. Exposure to, and Dose Modifications of, Individual Regimen Components.**

|                                | <b>A+AVD<br/>N = 662</b>                     |                                  |                                  |                                  |
|--------------------------------|----------------------------------------------|----------------------------------|----------------------------------|----------------------------------|
|                                | <b>Brentuximab<br/>vedotin<br/>(n = 662)</b> | <b>Doxorubicin<br/>(n = 656)</b> | <b>Vinblastine<br/>(n = 661)</b> | <b>Dacarbazine<br/>(n = 661)</b> |
| Duration of treatment (weeks)  |                                              |                                  |                                  |                                  |
| Mean (standard deviation)      | 23.19 (5.646)                                | 23.88 (5.362)                    | 23.60 (5.600)                    | 23.89 (5.335)                    |
| Median                         | 24.21                                        | 24.57                            | 24.43                            | 24.57                            |
| Min, max                       | 2.0, 35.0                                    | 2.0, 48.9                        | 2.0, 48.9                        | 2.0, 48.9                        |
| Total number of doses received |                                              |                                  |                                  |                                  |
| Mean (standard deviation)      | 10.8 (2.60)                                  | 11.2 (2.38)                      | 11.0 (2.50)                      | 11.2 (2.37)                      |
| Median                         | 12.0                                         | 12.0                             | 12.0                             | 12.0                             |
| Min, max                       | 1, 12                                        | 1, 12                            | 1, 12                            | 1, 12                            |
| Number of treated cycles       |                                              |                                  |                                  |                                  |
| Mean (standard deviation)      | 5.5 (1.21)                                   | 5.6 (1.13)                       | 5.6 (1.18)                       | 5.6 (1.12)                       |
| Median                         | 6.0                                          | 6.0                              | 6.0                              | 6.0                              |
| Min, max                       | 1, 6                                         | 1, 6                             | 1, 6                             | 1, 6                             |
| Action on study drug— no. (%)  | 434 (66)                                     | 355 (54)                         | 378 (57)                         | 350 (53)                         |
| Dose reduced prescribed        | 170 (26)                                     | 25 (4)                           | 58 (9)                           | 29 (4)                           |
| Dose reduced non-prescribed    | 3 (<1)                                       | 2 (<1)                           | 1 (<1)                           | 2 (<1)                           |
| Dose increased prescribed      | 0                                            | 0                                | 0                                | 0                                |
| Dose increased non-prescribed  | 0                                            | 0                                | 0                                | 0                                |
| Dose held                      | 41 (6)                                       | 2 (<1)                           | 12 (2)                           | 1 (<1)                           |
| Dose missed                    | 0                                            | 0                                | 1 (<1)                           | 0                                |
| Dose interrupted               | 12 (2)                                       | 8 (1)                            | 1 (<1)                           | 11 (2)                           |
| Dose delayed                   | 315 (48)                                     | 323 (49)                         | 319 (48)                         | 317 (48)                         |
| Dose discontinued permanently  | 71 (11)                                      | 38 (6)                           | 52 (8)                           | 38 (6)                           |
|                                | <b>ABVD<br/>N = 659</b>                      |                                  |                                  |                                  |
|                                | <b>Bleomycin<br/>(n = 659)</b>               | <b>Doxorubicin<br/>(n = 649)</b> | <b>Vinblastine<br/>(n = 659)</b> | <b>Dacarbazine<br/>(n = 659)</b> |
| Duration of treatment (weeks)  |                                              |                                  |                                  |                                  |
| Mean (standard deviation)      | 22.38 (5.694)                                | 23.88 (4.669)                    | 23.65 (4.880)                    | 23.86 (4.658)                    |
| Median                         | 24.00                                        | 24.00                            | 24.00                            | 24.00                            |
| Min, max                       | 2.0, 39.1                                    | 2.0, 45.4                        | 2.0, 45.4                        | 2.0, 45.4                        |
| Total number of doses received |                                              |                                  |                                  |                                  |
| Mean (standard deviation)      | 10.7 (2.64)                                  | 11.4 (2.00)                      | 11.3 (2.13)                      | 11.4 (2.02)                      |
| Median                         | 12.0                                         | 12.0                             | 12.0                             | 12.0                             |
| Min, max                       | 1, 12                                        | 1, 12                            | 1, 12                            | 1, 12                            |
| Number of treated cycles       |                                              |                                  |                                  |                                  |
| Mean (standard deviation)      | 5.4 (1.24)                                   | 5.7 (0.95)                       | 5.7 (1.01)                       | 5.7 (0.96)                       |
| Median                         | 6.0                                          | 6.0                              | 6.0                              | 6.0                              |
| Min, max                       | 1, 6                                         | 1, 6                             | 1, 6                             | 1, 6                             |
| Action on study drug— no. (%)  | 315 (48)                                     | 250 (38)                         | 281 (43)                         | 256 (39)                         |
| Dose reduced prescribed        | 17 (3)                                       | 24 (4)                           | 61 (9)                           | 19 (3)                           |
| Dose reduced non-prescribed    | 1 (<1)                                       | 1 (<1)                           | 2 (<1)                           | 3 (<1)                           |
| Dose increased prescribed      | 0                                            | 0                                | 1 (<1)                           | 0                                |
| Dose increased non-prescribed  | 1 (<1)                                       | 1 (<1)                           | 0                                | 1 (<1)                           |
| Dose held                      | 32 (5)                                       | 1 (<1)                           | 9 (1)                            | 1 (<1)                           |
| Dose missed                    | 2 (<1)                                       | 2 (<1)                           | 3 (<1)                           | 2 (<1)                           |
| Dose interrupted               | 6 (<1)                                       | 11 (2)                           | 3 (<1)                           | 28 (4)                           |
| Dose delayed                   | 211 (32)                                     | 218 (33)                         | 219 (33)                         | 215 (33)                         |
| Dose discontinued permanently  | 106 (16)                                     | 22 (3)                           | 34 (5)                           | 22 (3)                           |

A+AVD, brentuximab vedotin plus doxorubicin, vinblastine, dacarbazine; ABVD, doxorubicin, bleomycin, vinblastine, dacarbazine.

**Table S7. Summary of Adverse Events in the Safety Population.**

| <b>Safety summary — no. (%)</b>                                     | <b>A+AVD<br/>N = 662</b> |                         | <b>ABVD<br/>N = 659</b> |                         |
|---------------------------------------------------------------------|--------------------------|-------------------------|-------------------------|-------------------------|
| Any adverse event                                                   | 653 (99)                 |                         | 646 (98)                |                         |
| Drug-related adverse event                                          | 641 (97)                 |                         | 617 (94)                |                         |
| Grade ≥3 adverse event                                              | 549 (83)                 |                         | 434 (66)                |                         |
| Drug-related Grade ≥3 adverse event                                 | 525 (79)                 |                         | 389 (59)                |                         |
| Serious adverse event                                               | 284 (43)                 |                         | 178 (27)                |                         |
| Drug-related serious adverse event                                  | 240 (36)                 |                         | 125 (19)                |                         |
| Adverse event resulting in drug discontinuation                     | 88 (13)                  |                         | 105 (16)                |                         |
| Adverse event resulting in dose modification                        | 423 (64)                 |                         | 293 (44)                |                         |
| Dose held                                                           | 44 (7)                   |                         | 32 (5)                  |                         |
| Dose interrupted                                                    | 22 (3)                   |                         | 33 (5)                  |                         |
| Dose reduced                                                        | 191 (29)                 |                         | 65 (10)                 |                         |
| Dose delayed                                                        | 318 (48)                 |                         | 217 (33)                |                         |
| Death during treatment*                                             | 9 (1)                    |                         | 13 (2)                  |                         |
| Death due to drug-related adverse events                            | 8 (1)                    |                         | 7 (1)                   |                         |
| Hospitalizations                                                    | 242 (37)                 |                         | 186 (28)                |                         |
| <b>Common adverse events — no. (%)</b>                              | <b>Any grade</b>         | <b>Grade ≥3</b>         | <b>Any grade</b>        | <b>Grade ≥3</b>         |
| Neutropenia                                                         | 382 (58)                 | 357 (54)                | 295 (45)                | 260 (39)                |
| Nausea                                                              | 348 (53)                 | 20 (3)                  | 371 (56)                | 7 (1)                   |
| Constipation                                                        | 279 (42)                 | 11 (2)                  | 241 (37)                | 4 (<1)                  |
| Vomiting                                                            | 216 (33)                 | 23 (3)                  | 183 (28)                | 9 (1)                   |
| Fatigue                                                             | 211 (32)                 | 19 (3)                  | 211 (32)                | 7 (1)                   |
| Peripheral sensory neuropathy                                       | 189 (29)                 | 31 (5)                  | 111 (17)                | 3 (<1)                  |
| Diarrhea                                                            | 181 (27)                 | 19 (3)                  | 121 (18)                | 5 (<1)                  |
| Pyrexia                                                             | 179 (27)                 | 19 (3)                  | 147 (22)                | 13 (2)                  |
| Peripheral neuropathy                                               | 174 (26)                 | 27 (4)                  | 85 (13)                 | 6 (<1)                  |
| Alopecia                                                            | 173 (26)                 | 1 (<1)                  | 146 (22)                | 0                       |
| Weight decreased                                                    | 148 (22)                 | 6 (<1)                  | 40 (6)                  | 1 (<1)                  |
| Abdominal pain                                                      | 142 (21)                 | 21 (3)                  | 65 (10)                 | 4 (<1)                  |
| Anemia                                                              | 140 (21)                 | 54 (8)                  | 67 (10)                 | 25 (4)                  |
| Stomatitis                                                          | 138 (21)                 | 10 (2)                  | 104 (16)                | 3 (<1)                  |
| Febrile neutropenia                                                 | 128 (19)                 | 128 (19)                | 52 (8)                  | 52 (8)                  |
| Bone pain                                                           | 126 (19)                 | 6 (<1)                  | 66 (10)                 | 1 (<1)                  |
| Insomnia                                                            | 126 (19)                 | 4 (<1)                  | 82 (12)                 | 1 (<1)                  |
| Decreased appetite                                                  | 118 (18)                 | 5 (<1)                  | 76 (12)                 | 2 (<1)                  |
| Cough                                                               | 97 (15)                  | 0                       | 123 (19)                | 0                       |
| Headache                                                            | 95 (14)                  | 2 (<1)                  | 94 (14)                 | 2 (<1)                  |
| Arthralgia                                                          | 89 (13)                  | 2 (<1)                  | 78 (12)                 | 0                       |
| Neutrophil count decreased                                          | 86 (13)                  | 83 (13)                 | 79 (12)                 | 67 (10)                 |
| Dyspepsia                                                           | 84 (13)                  | 1 (<1)                  | 75 (11)                 | 0                       |
| Paresthesia                                                         | 84 (13)                  | 0                       | 73 (11)                 | 0                       |
| Back pain                                                           | 83 (13)                  | 4 (<1)                  | 49 (7)                  | 0                       |
| Dyspnea                                                             | 82 (12)                  | 9 (1)                   | 124 (19)                | 11 (2)                  |
| Myalgia                                                             | 81 (12)                  | 3 (<1)                  | 71 (11)                 | 3 (<1)                  |
| Pain in extremity                                                   | 81 (12)                  | 2 (<1)                  | 67 (10)                 | 1 (<1)                  |
| Oropharyngeal pain                                                  | 72 (11)                  | 2 (<1)                  | 55 (8)                  | 3 (<1)                  |
| Upper respiratory tract infection                                   | 70 (11)                  | 5 (<1)                  | 70 (11)                 | 3 (<1)                  |
| Alanine aminotransferase increased                                  | 68 (10)                  | 22 (3)                  | 26 (4)                  | 1 (<1)                  |
| <b>G-CSF primary prophylaxis — no. (%)</b>                          | <b>No<br/>(n = 579)</b>  | <b>Yes<br/>(n = 83)</b> | <b>No<br/>(n = 616)</b> | <b>Yes<br/>(n = 43)</b> |
| Febrile neutropenia in Cycle 1                                      | 61 (11)                  | 1 (1)                   | 24 (4)                  | 2 (5)                   |
| Febrile neutropenia during treatment                                | 119 (21)                 | 9 (11)                  | 49 (8)                  | 3 (7)                   |
| Any neutropenia <sup>†</sup>                                        | 425 (73)                 | 29 (35)                 | 352 (57)                | 9 (21)                  |
| Neutropenia Grade ≥3 <sup>†</sup>                                   | 406 (70)                 | 24 (29)                 | 309 (50)                | 8 (19)                  |
| Grade ≥3 adverse event                                              | 502 (87)                 | 47 (57)                 | 414 (67)                | 20 (47)                 |
| Infections and infestations (SOC)                                   | 322 (56)                 | 39 (47)                 | 312 (51)                | 19 (44)                 |
| Grade ≥3 infections and infestations (SOC)                          | 107 (18)                 | 9 (11)                  | 63 (10)                 | 3 (7)                   |
| Serious adverse event                                               | 257 (44)                 | 27 (33)                 | 171 (28)                | 7 (16)                  |
| Serious adverse events of febrile neutropenia, neutropenia, sepsis, | 190 (33)                 | 20 (24)                 | 107 (17)                | 4 (9)                   |



---

neutropenic sepsis, pyrexia, or infections  
and infestations (SOC)

Death during treatment\*

8 (1)

1 (1)‡

12 (2)

1 (2)

---

\*Defined as a death that occurred within 30 days after the last dose of frontline therapy.

†Neutropenia and neutropenia Grade  $\geq 3$  (neutrophil count  $< 1000$  per cubic millimeter) include the preferred terms of 'neutropenia' and 'neutrophil count decreased'.

‡The patient in the A+AVD group who had G-CSF primary prophylaxis received G-CSF for treatment of neutropenia, which occurred before day 5.

A+AVD, brentuximab vedotin plus doxorubicin, vinblastine, dacarbazine; ABVD, doxorubicin, bleomycin, vinblastine, dacarbazine; G-CSF, granulocyte colony-stimulating factor; SOC, system organ class for the noted event.

**Table S8. Summary of Peripheral Neuropathy (SMQ) (Safety Population).**

| <b>Patients with event — no. (%)</b>         | <b>A+AVD<br/>N = 662</b> | <b>ABVD<br/>N = 659</b> | <b>Total<br/>N = 1321</b> |
|----------------------------------------------|--------------------------|-------------------------|---------------------------|
| <b>Any peripheral neuropathy (SMQ) event</b> | 442 (67)                 | 286 (43)                | 728 (55)                  |
| <b>Peripheral motor neuropathy (SSQ)*‡</b>   | 74 (11)                  | 29 (4)                  | 103 (8)                   |
| Peripheral motor neuropathy                  | 42 (6)                   | 8 (1)                   | 50 (4)                    |
| Muscular weakness                            | 36 (5)                   | 18 (3)                  | 54 (4)                    |
| Peroneal nerve palsy                         | 1 (<1)                   | 2 (<1)                  | 3 (<1)                    |
| Muscle atrophy                               | 2 (<1)                   | 0                       | 2 (<1)                    |
| Hypotonia                                    | 0                        | 1 (<1)                  | 1 (<1)                    |
| <b>Autonomic neuropathy</b>                  | 1 (<1)                   | 2 (<1)                  | 3 (<1)                    |
| <b>Peripheral sensory neuropathy (SSQ)†‡</b> | 429 (65)                 | 273 (41)                | 702 (53)                  |
| Peripheral sensory neuropathy                | 189 (29)                 | 111 (17)                | 300 (23)                  |
| Neuropathy peripheral                        | 174 (26)                 | 85 (13)                 | 259 (20)                  |
| Paraesthesia                                 | 84 (13)                  | 73 (11)                 | 157 (12)                  |
| Hypoesthesia                                 | 33 (5)                   | 27 (4)                  | 60 (5)                    |
| Polyneuropathy                               | 10 (2)                   | 6 (<1)                  | 16 (1)                    |
| Neuralgia                                    | 8 (1)                    | 1 (<1)                  | 9 (<1)                    |
| Burning sensation                            | 2 (<1)                   | 4 (<1)                  | 6 (<1)                    |
| Dysaesthesia                                 | 4 (<1)                   | 1 (<1)                  | 5 (<1)                    |
| Gait disturbance                             | 3 (<1)                   | 0                       | 3 (<1)                    |
| Toxic neuropathy                             | 3 (<1)                   | 0                       | 3 (<1)                    |
| Neurotoxicity                                | 2 (<1)                   | 0                       | 2 (<1)                    |
| Sensory disturbance                          | 0                        | 1 (<1)                  | 1 (<1)                    |

\*Includes the preferred terms of peripheral motor neuropathy, peripheral sensorimotor neuropathy, peroneal nerve palsy, muscular weakness, hypotonia, or muscle atrophy.

†Includes all other preferred terms except for autonomic neuropathy, and the six preferred terms for peripheral motor neuropathy.

‡Numbers in individual categories exceed total because some patients experienced more than one type of neuropathy.

A+AVD, brentuximab vedotin plus doxorubicin, vinblastine, dacarbazine; ABVD, doxorubicin, bleomycin, vinblastine, dacarbazine; SMQ, standardized Medical Dictionary for Regulatory Activities query; SSQ, special search query.

## References

1. Hasenclever D, Diehl V. A prognostic score for advanced Hodgkin's disease. International Prognostic Factors Project on Advanced Hodgkin's Disease. *N Engl J Med* 1998;339:1506-14. [PMID:9819449]
2. Lister TA, Crowther D, Sutcliffe SB, et al. Report of a committee convened to discuss the evaluation and staging of patients with Hodgkin's disease: Cotswolds meeting. *J Clin Oncol* 1989;7:1630-6. [PMID: 2809679]
3. Oken MM, Creech RH, Tormey DC, et al. Toxicity and response criteria of the Eastern Cooperative Oncology Group. *Am J Clin Oncol* 1982;5:649-55. [PMID: 7165009]
4. Meignan M, Gallamini A, Haioun C, Polliack A. Report on the Second International Workshop on interim positron emission tomography in lymphoma held in Menton, France, 8-9 April 2010. *Leuk Lymphoma* 2010;51:2171-80. [PMID: 21077737]
